# Supplementary figures and images for: The gas phase ozonolysis and secondary OH production of cashmeran, a musk compound from fragrant volatile chemical products
Source: Royal Society of Chemistry journal article supplement (doi:10.1039/d4em00452c), 2024-10-23

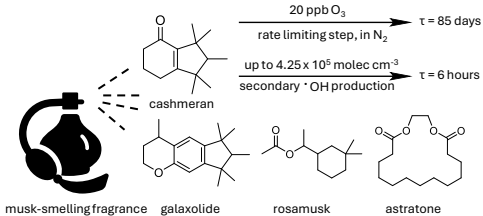

Supplement: d4em00452c3.zip [file d4em00452c3.zip]
